# Supplementary material for: Co-Spray Dried Nafamostat Mesylate with Lecithin and Mannitol as Respirable Microparticles for Targeted Pulmonary Delivery: Pharmacokinetics and Lung Distribution in Rats
Source: MDPI journal article supplement (doi:10.3390/pharmaceutics13091519), 2021-09-19
Supplement: s1 [file s1]

# Supplementary Materials: Co-Spray Dried Nafamostat Mesylate with Lecithin and Mannitol as Respirable Microparticles for Targeted Pulmonary Delivery: Pharmacokinetics and Lung Distribution in Rats

Ji-Hyun Kang, Young-Jin Kim, Min-Seok Yang, Dae Hwan Shin, Dong-Wook Kim, Il Yeong Park and Chun-Woong Park

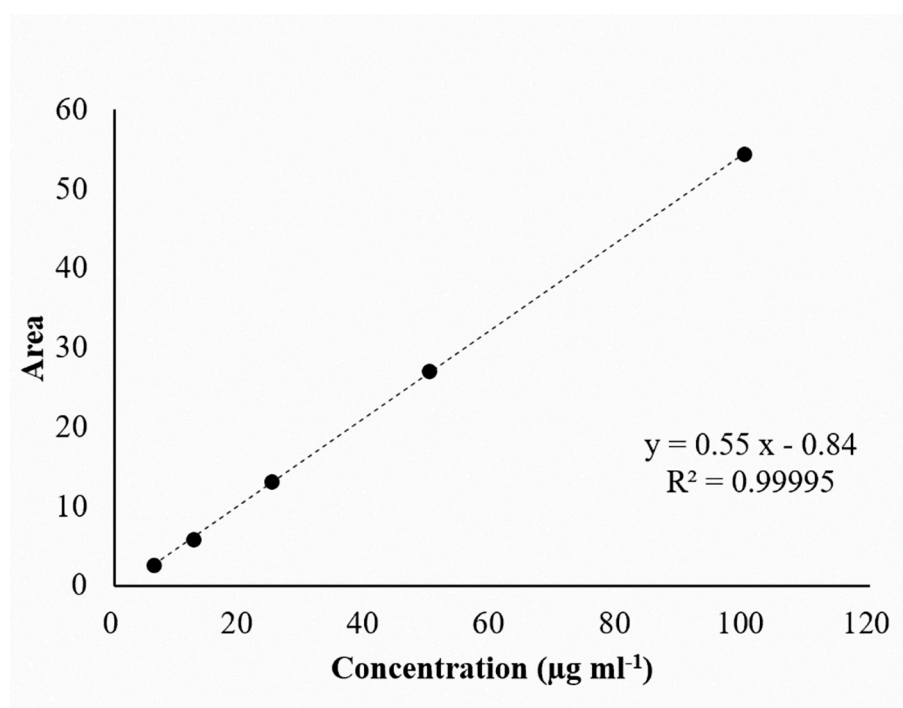

**Figure S1.** Linearity of nafamostat mesylate (NFM) HPLC analysis method validation.

**Table S1.** Linearity of nafamostat mesylate (NFM) HPLC analysis method validation.

| Concentration (µg mL <sup>-1</sup> ) | Area    | Calculated Concentration (µg mL <sup>-1</sup> ) | Deviation (%) |
|--------------------------------------|---------|-------------------------------------------------|---------------|
| 6.25                                 | 2.58    | 6.18                                            | 1.10          |
| 12.50                                | 5.897   | 12.17                                           | 2.64          |
| 25.00                                | 13.182  | 25.32                                           | 1.29          |
| 50.00                                | 26.975  | 50.22                                           | 0.45          |
| 100.00                               | 54.465  | 99.85                                           | 0.15          |
| <b>R<sup>2</sup></b>                 | 0.99995 |                                                 |               |
| <b>Slope</b>                         | 0.55    |                                                 |               |
| <b>Intercept</b>                     | -0.84   |                                                 |               |

**Table S2.** Accuracy of nafamostat mesylate (NFM) HPLC analysis method validation.

| Sample No.         | Concentration ( $\mu\text{g mL}^{-1}$ ) | area  | Founded Concentration ( $\mu\text{g mL}^{-1}$ ) | recovery (%) |
|--------------------|-----------------------------------------|-------|-------------------------------------------------|--------------|
| 1                  | 25.00                                   | 13.75 | 26.34                                           | 105.37       |
| 2                  | 50.00                                   | 27.52 | 51.20                                           | 102.40       |
| 3                  | 100.00                                  | 55.29 | 101.34                                          | 101.34       |
| 4                  | 25.00                                   | 13.80 | 26.44                                           | 105.75       |
| 5                  | 50.00                                   | 27.58 | 51.31                                           | 102.62       |
| 6                  | 100.00                                  | 55.06 | 100.93                                          | 100.93       |
| 7                  | 25.00                                   | 13.88 | 26.59                                           | 106.35       |
| 8                  | 50.00                                   | 27.53 | 51.23                                           | 102.46       |
| 9                  | 100.00                                  | 55.16 | 101.10                                          | 101.10       |
| Average            |                                         |       |                                                 | 103.15       |
| Standard deviation |                                         |       |                                                 | 2.11         |
| %RSD               |                                         |       |                                                 | 2.05         |

**Table S3.** Precision of nafamostat mesylate (NFM) HPLC analysis method validation.

| Sample No.         | Concentration ( $\mu\text{g mL}^{-1}$ ) | area  |
|--------------------|-----------------------------------------|-------|
| 1                  | 100                                     | 54.26 |
| 2                  | 100                                     | 54.10 |
| 3                  | 100                                     | 54.28 |
| 4                  | 100                                     | 54.94 |
| 5                  | 100                                     | 54.41 |
| 6                  | 100                                     | 55.09 |
| Average            |                                         | 54.52 |
| Standard deviation |                                         | 0.40  |
| %RSD               |                                         | 0.74  |
